# Supplementary material for: Contact System Activation in Plasma from Dengue Patients Might Harness Endothelial Virus Replication through the Signaling of Bradykinin Receptors
Source: MDPI journal article supplement (doi:10.3390/ph14010056), 2021-01-12
Supplement: s1 [file s1]

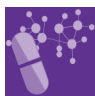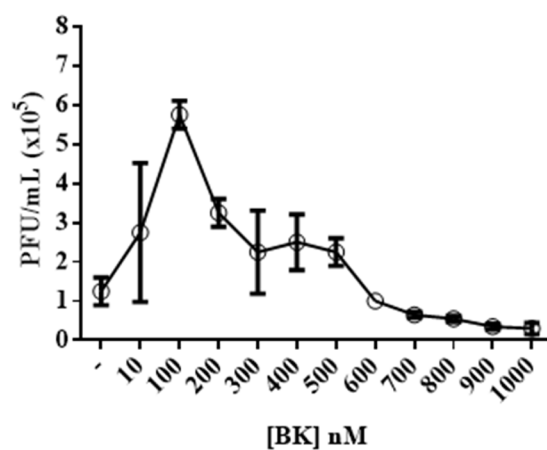

Figure S1. BK dose response of DENV increased replication in HBMEC.

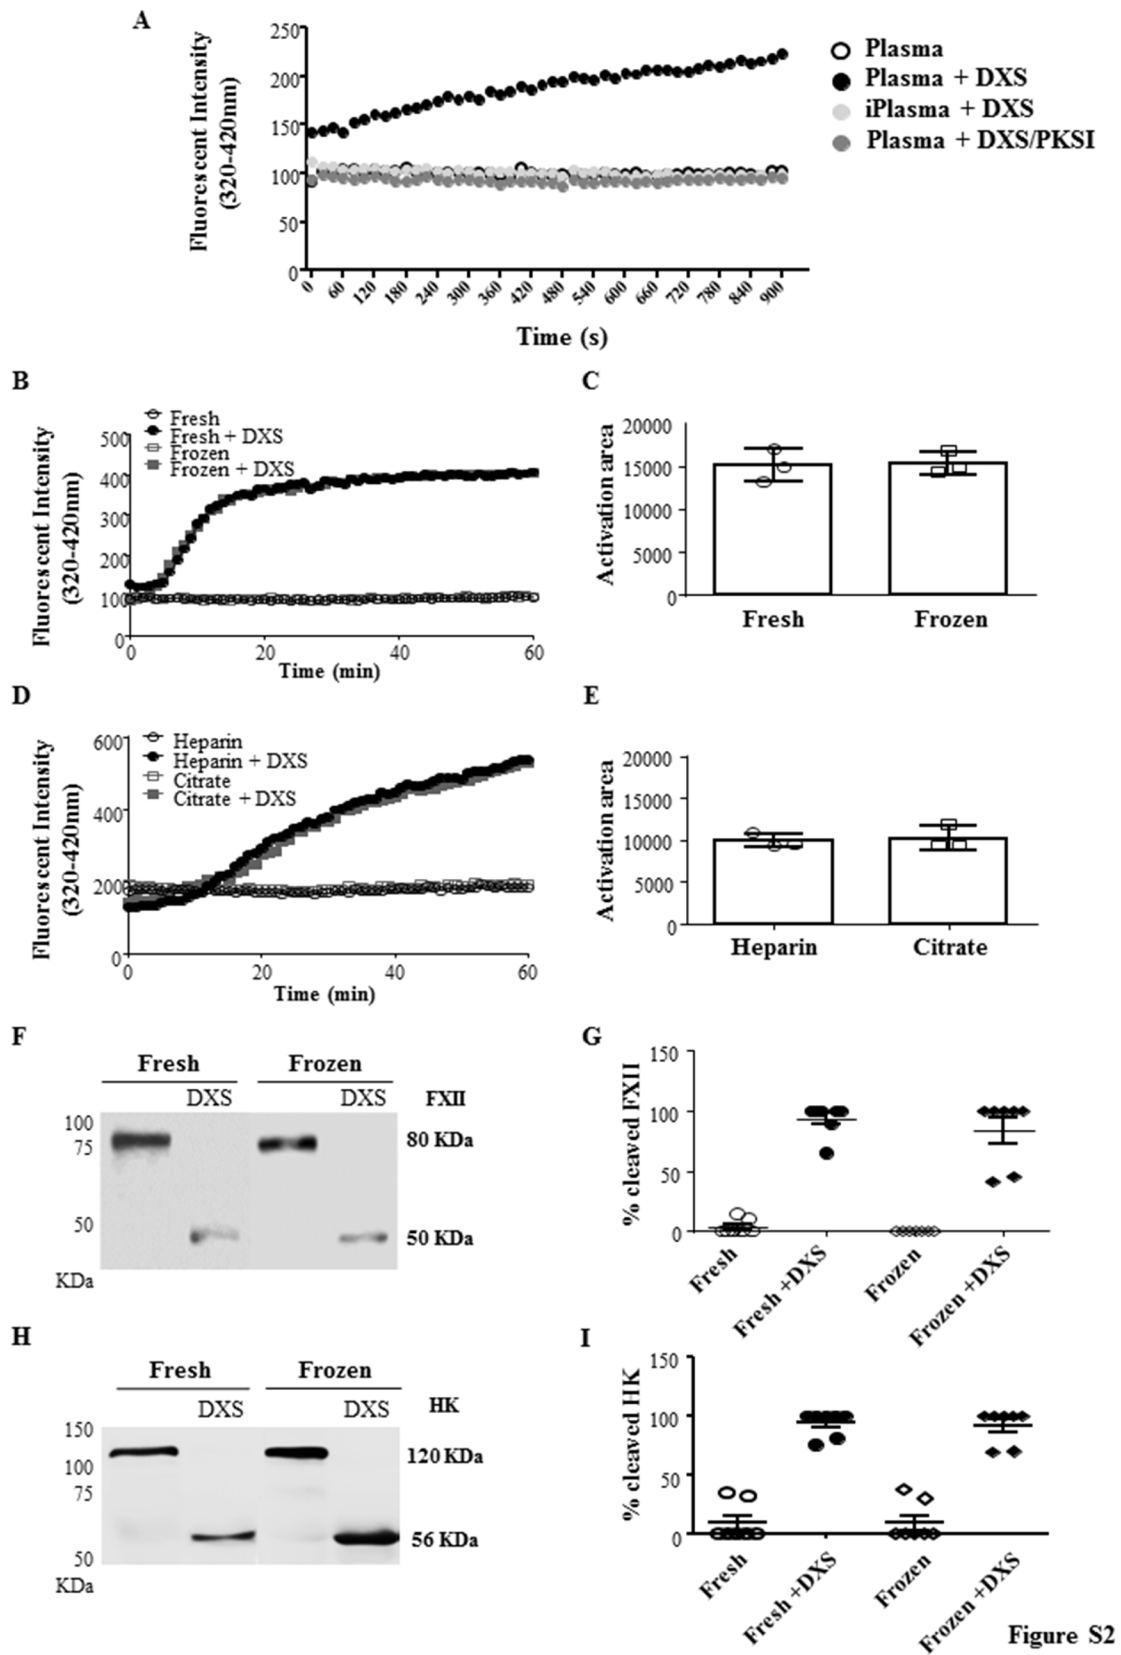

Figure S2

Figure S2. Evaluation of the interference of the plasmas stock condition for the hydrolysis assay.

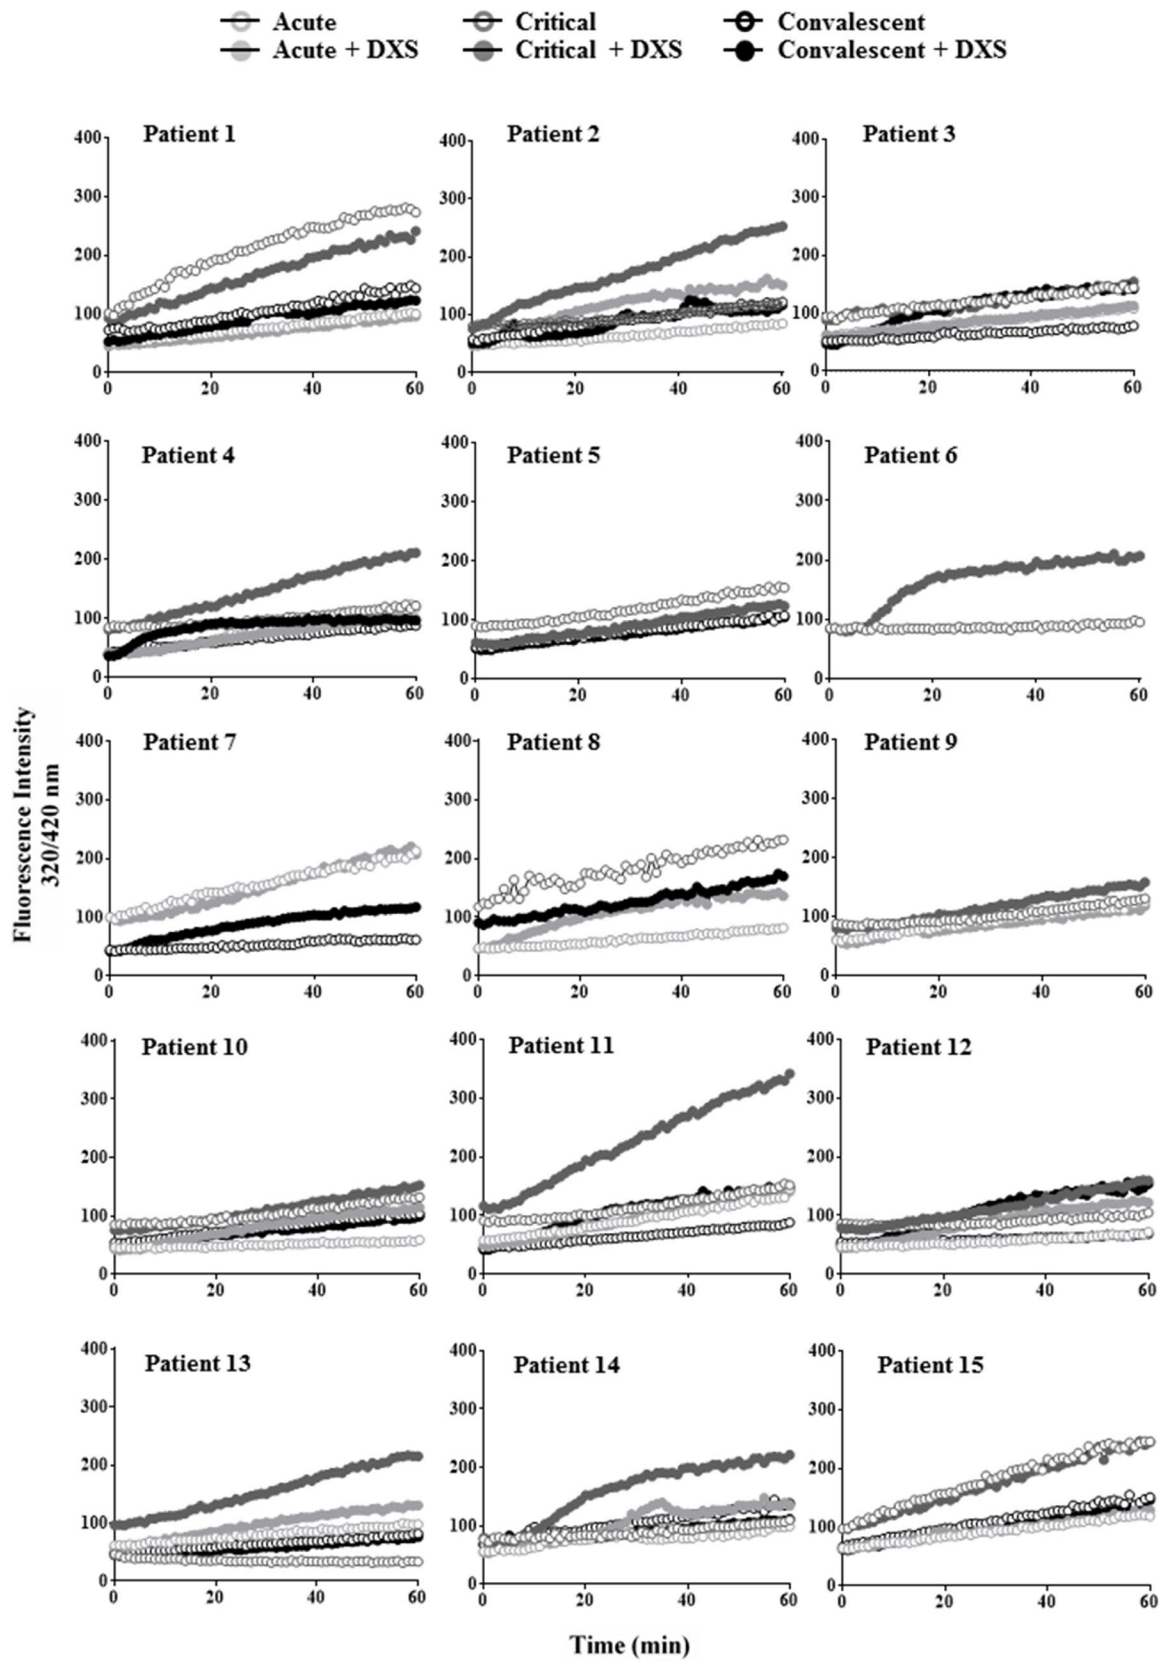

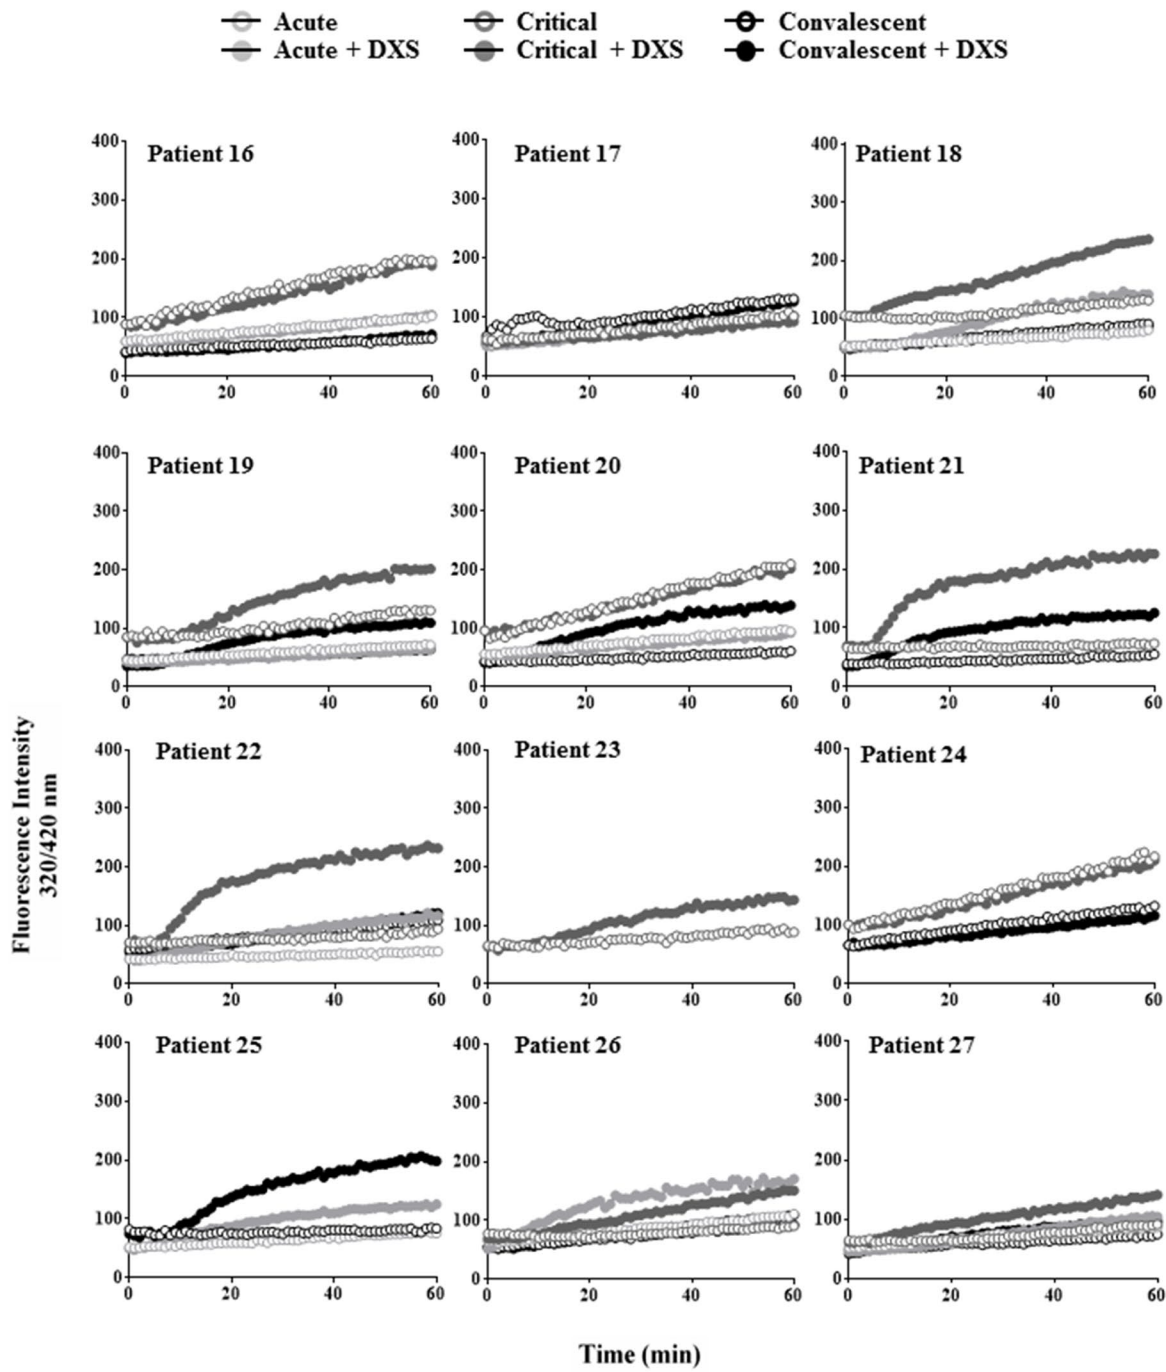

Figure S3. Hydrolysis of all DENV samples at different time points upon the symptom's onset.

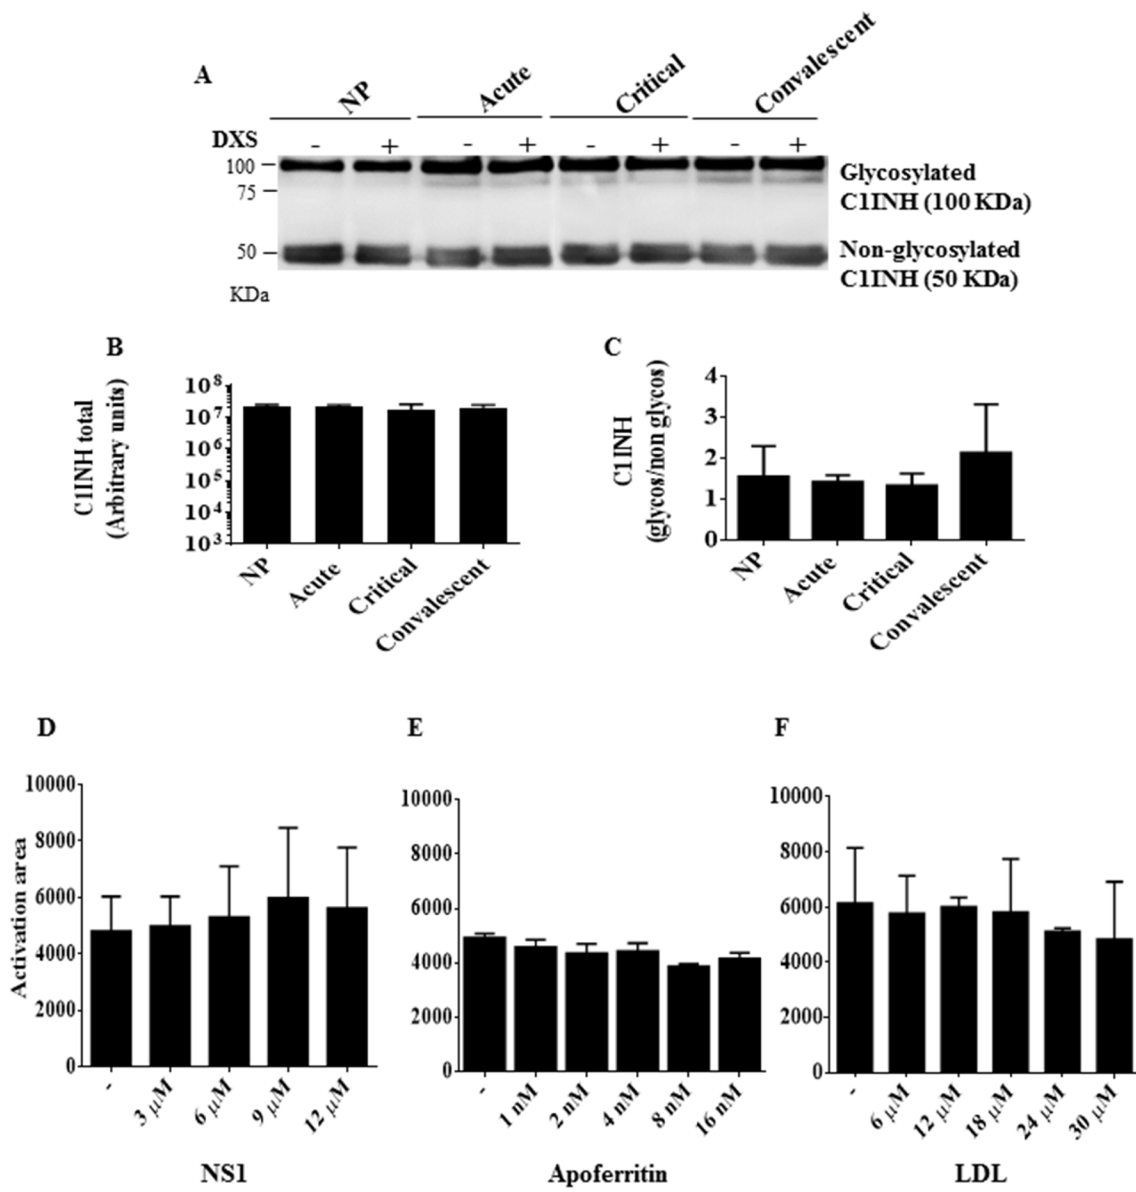

**Figure S4.** Lower DXS-driven KKS activation in the plasmas from dengue patients is not due to C1inhibitor, NS1, ferritinemia, or increased LDL.
